# Supplementary material for: Marine turtles are not fussy nesters: a novel test of small-scale nest site selection using structure from motion beach terrain information
Source: PubMed Central journal article supplement (PMC5217528; doi:10.7717/peerj.2770), 2017-01-04
Supplement: peerj-05-2770-s008.pdf [file peerj-05-2770-s008.pdf]

| ID  | NEST /<br>RANDOM | SPECIES    | Latitude<br>(deg) | Longitude<br>(deg) | Beach<br>Width (m) | Beach<br>Slope<br>(m) | Dune<br>Width<br>(m) | Dune<br>Slope<br>(deg) | Dune<br>Crest<br>Height<br>(m) | Profile<br>Curvature | Terrain<br>Ruggedness | Dist. to<br>dense Veg.<br>(m) | Dist. to<br>sparse<br>Veg. (m) | Distance<br>to Urban<br>(m) | Illuminance<br>(mcd/m <sup>2</sup> ) |
|-----|------------------|------------|-------------------|--------------------|--------------------|-----------------------|----------------------|------------------------|--------------------------------|----------------------|-----------------------|-------------------------------|--------------------------------|-----------------------------|--------------------------------------|
| N1  | Nest             | Loggerhead | -26.591           | 153.097            | 19.514             | 6.291                 | 6.500                | 20.782                 | 5.961                          | -0.072               | 0.039                 | 4.909                         | 2.460                          | 69.029                      | 1.437                                |
| N2  | Nest             | Loggerhead | -26.415           | 153.111            | 17.700             | 3.211                 | 10.644               | 3.719                  | 3.283                          | -0.042               | 0.018                 | 12.661                        | 1.726                          | 59.641                      | 4.144                                |
| N3  | Nest             | Loggerhead | -26.424           | 153.108            | 50.302             | 3.956                 | 8.501                | 28.746                 | 10.543                         | 0.016                | 0.011                 | 12.739                        | 1.562                          | 104.202                     | 2.116                                |
| N4  | Nest             | Green      | -26.428           | 153.108            | 3.036              | 9.680                 | 30.971               | 8.296                  | 7.340                          | 0.013                | 0.048                 | 2.729                         | 0.985                          | 197.608                     | 9.066                                |
| N5  | Nest             | Loggerhead | -26.430           | 153.108            | 11.671             | 5.592                 | 7.877                | 18.098                 | 5.698                          | 0.003                | 0.102                 | 3.162                         | 1.476                          | 179.622                     | 13.722                               |
| N6  | Nest             | Loggerhead | -26.436           | 153.106            | 27.979             | 6.713                 | 16.254               | 14.635                 | 8.459                          | -0.084               | 0.041                 | 2.600                         | 2.000                          | 113.071                     | 8.579                                |
| N7  | Nest             | Loggerhead | -26.449           | 153.104            | 32.423             | 3.488                 | 17.043               | 13.266                 | 6.820                          | 0.009                | 0.012                 | 1.789                         | 0.000                          | 355.035                     | 8.193                                |
| N8  | Nest             | Loggerhead | -26.447           | 153.104            | 18.251             | 6.512                 | 13.813               | 14.635                 | 7.166                          | 0.006                | 0.015                 | 3.195                         | 0.500                          | 315.087                     | 6.215                                |
| N9  | Nest             | Green      | -26.475           | 153.099            | 33.743             | 2.285                 | 15.508               | 14.621                 | 6.582                          | -0.001               | 0.006                 | 6.888                         | 1.200                          | 156.083                     | 4.339                                |
| N10 | Nest             | Loggerhead | -26.495           | 153.096            | 14.009             | 5.627                 | 6.450                | 18.673                 | 5.377                          | -0.003               | 0.026                 | 1.044                         | 0.300                          | 85.866                      | 4.544                                |
| N11 | Nest             | Loggerhead | -26.512           | 153.094            | 14.128             | -0.665                | 6.008                | 25.748                 | 4.455                          | -0.037               | 0.005                 | 3.517                         | 0.900                          | 568.177                     | 0.639                                |
| N12 | Nest             | Loggerhead | -26.559           | 153.100            | 17.631             | 3.594                 | 12.281               | 18.084                 | 7.661                          | 0.002                | 0.005                 | 8.078                         | 1.868                          | 139.918                     | 1.877                                |
| N13 | Nest             | Loggerhead | -26.563           | 153.099            | 22.958             | 4.677                 | 7.737                | 18.527                 | 6.140                          | -0.002               | 0.030                 | 4.837                         | 0.800                          | 136.781                     | 1.635                                |
| N14 | Nest             | Loggerhead | -26.566           | 153.099            | 12.287             | 6.069                 | 7.009                | 19.187                 | 5.417                          | 0.008                | 0.025                 | 8.235                         | 3.523                          | 141.152                     | 1.680                                |
| N15 | Nest             | Loggerhead | -26.569           | 153.099            | 10.830             | 7.064                 | 22.642               | 7.541                  | 6.335                          | 0.027                | 0.009                 | 10.296                        | 0.600                          | 194.833                     | 0.257                                |
| N16 | Nest             | Loggerhead | -26.552           | 153.101            | 21.257             | 0.678                 | 2.571                | 19.909                 | 6.966                          | -0.036               | 0.033                 | 2.642                         | 1.800                          | 56.294                      | 0.392                                |
| N17 | Nest             | Loggerhead | -26.597           | 153.098            | 20.348             | 7.172                 | 9.330                | 10.692                 | 4.831                          | -0.005               | 0.013                 | 6.629                         | 2.915                          | 202.988                     | 3.479                                |
| N18 | Nest             | Loggerhead | -26.433           | 153.107            | 17.424             | 5.995                 | 14.360               | 16.071                 | 7.934                          | -0.010               | 0.009                 | 10.878                        | 1.345                          | 165.940                     | 7.070                                |
| N19 | Nest             | Loggerhead | -26.560           | 153.100            | 2.000              | 10.154                | 15.926               | 8.124                  | 5.126                          | 0.014                | 0.054                 | 9.513                         | 1.063                          | 151.076                     | 1.635                                |
| R1  | Random           | Loggerhead | -26.609           | 153.100            | 7.376              | 3.031                 | 11.800               | 12.756                 | 5.523                          | -0.004               | 0.043                 | 0.943                         | 0.000                          | 55.145                      | 4.802                                |
| R2  | Random           | Loggerhead | -26.609           | 153.100            | 9.067              | 3.599                 | 10.119               | 12.480                 | 4.983                          | -0.009               | 0.008                 | 6.100                         | 0.141                          | 58.000                      | 2.363                                |
| R3  | Random           | Loggerhead | -26.507           | 153.094            | 33.230             | 4.781                 | 4.545                | 30.418                 | 6.773                          | 0.004                | 0.001                 | 13.447                        | 7.849                          | 588.782                     | 1.635                                |
| R4  | Random           | Loggerhead | -26.507           | 153.094            | 33.725             | 5.163                 | 2.791                | 24.696                 | 5.645                          | -0.001               | 0.001                 | 20.577                        | 15.369                         | 597.234                     | 1.561                                |
| R5  | Random           | Loggerhead | -26.560           | 153.100            | 6.708              | 9.260                 | 15.940               | 9.625                  | 5.620                          | -0.324               | 0.167                 | 0.000                         | 7.940                          | 128.763                     | 1.450                                |
| R6  | Random           | Loggerhead | -26.560           | 153.100            | 8.322              | 5.228                 | 6.259                | 12.653                 | 3.992                          | -0.026               | 0.011                 | 6.908                         | 0.000                          | 150.030                     | 1.620                                |
| R7  | Random           | Loggerhead | -26.433           | 153.107            | 18.515             | 6.031                 | 12.637               | 17.726                 | 7.990                          | -0.009               | 0.016                 | 17.395                        | 0.283                          | 174.614                     | 4.937                                |
| R8  | Random           | Loggerhead | -26.433           | 153.107            | 21.648             | 5.285                 | 16.920               | 13.674                 | 7.722                          | -0.002               | 0.021                 | 10.653                        | 0.566                          | 161.208                     | 7.611                                |
| R9  | Random           | Green      | -26.597           | 153.098            | 20.756             | 6.824                 | 8.200                | 15.806                 | 5.733                          | 0.003                | 0.013                 | 7.806                         | 1.414                          | 202.556                     | 4.300                                |
| R10 | Random           | Green      | -26.597           | 153.098            | 18.604             | 6.443                 | 7.432                | 18.231                 | 5.993                          | -0.005               | 0.012                 | 14.290                        | 0.283                          | 208.866                     | 3.322                                |
| R11 | Random           | Loggerhead | -26.413           | 153.111            | 16.931             | 2.227                 | 13.823               | 3.049                  | 4.088                          | -0.015               | 0.024                 | 0.000                         | 1.900                          | 99.081                      | 1.263                                |
| R12 | Random           | Loggerhead | -26.413           | 153.111            | 2.200              | 0.108                 | 38.869               | 0.626                  | 1.797                          | 0.007                | 0.005                 | 8.981                         | 1.860                          | 128.191                     | 5.314                                |
| R13 | Random           | Loggerhead | -26.552           | 153.101            | 12.947             | 6.757                 | 7.300                | 12.954                 | 6.101                          | -0.009               | 0.018                 | 2.003                         | 0.100                          | 65.734                      | 1.080                                |
| R14 | Random           | Loggerhead | -26.552           | 153.101            | 12.728             | 6.938                 | 6.657                | 14.617                 | 6.163                          | -0.004               | 0.007                 | 15.533                        | 12.667                         | 79.555                      | 0.714                                |
| R15 | Random           | Loggerhead | -26.491           | 153.097            | 27.922             | 4.525                 | 9.818                | 15.119                 | 6.056                          | 0.002                | 0.005                 | 7.497                         | 1.342                          | 91.351                      | 4.802                                |
| R16 | Random           | Loggerhead | -26.491           | 153.097            | 29.603             | 4.312                 | 8.386                | 18.505                 | 6.158                          | 0.007                | 0.132                 | 0.000                         | 1.400                          | 73.682                      | 2.363                                |
| R17 | Random           | Loggerhead | -26.568           | 153.099            | 12.700             | 7.284                 | 21.557               | 7.456                  | 6.387                          | -0.027               | 0.036                 | 1.780                         | 0.000                          | 184.532                     | 1.251                                |
| R18 | Random           | Loggerhead | -26.569           | 153.099            | 14.080             | 6.127                 | 20.841               | 10.602                 | 7.088                          | -0.012               | 0.006                 | 16.510                        | 0.200                          | 202.200                     | 1.121                                |
| R19 | Random           | Loggerhead | -26.566           | 153.099            | 11.610             | 5.874                 | 7.580                | 18.352                 | 5.347                          | 0.006                | 0.035                 | 0.200                         | 0.000                          | 131.856                     | 1.826                                |
| R20 | Random           | Loggerhead | -26.566           | 153.099            | 6.552              | 6.253                 | 10.211               | 14.123                 | 5.108                          | -0.009               | 0.019                 | 7.224                         | 1.200                          | 142.144                     | 1.195                                |
| R21 | Random           | Green      | -26.563           | 153.099            | 22.840             | 4.189                 | 8.013                | 19.804                 | 6.455                          | -0.007               | 0.016                 | 7.543                         | 0.300                          | 141.028                     | 1.760                                |
| R22 | Random           | Green      | -26.564           | 153.099            | 22.830             | 4.611                 | 7.653                | 19.044                 | 6.162                          | -0.010               | 0.002                 | 10.435                        | 1.697                          | 143.014                     | 1.195                                |
| R23 | Random           | Loggerhead | -26.559           | 153.100            | 18.840             | 5.862                 | 8.538                | 15.805                 | 7.076                          | -0.004               | 0.041                 | 4.684                         | 0.583                          | 132.639                     | 2.407                                |
| R24 | Random           | Loggerhead | -26.559           | 153.100            | 13.262             | 5.021                 | 12.900               | 16.608                 | 7.600                          | -0.069               | 0.107                 | 0.000                         | 0.894                          | 121.696                     | 2.639                                |
| R25 | Random           | Loggerhead | -26.552           | 153.101            | 12.417             | 6.958                 | 4.318                | 27.279                 | 6.672                          | 0.009                | 0.088                 | 0.000                         | 0.700                          | 61.814                      | 0.890                                |
| R26 | Random           | Loggerhead | -26.552           | 153.101            | 5.600              | 9.864                 | 14.410               | 10.285                 | 6.814                          | 0.002                | 0.018                 | 6.512                         | 3.513                          | 74.953                      | 1.323                                |
| R27 | Random           | Loggerhead | -26.512           | 153.094            | 14.406             | -1.378                | 5.700                | 28.955                 | 4.544                          | 0.111                | 0.104                 | 0.000                         | 1.500                          | 562.100                     | 0.923                                |
| R28 | Random           | Loggerhead | -26.512           | 153.094            | 24.910             | -1.751                | 4.904                | 37.949                 | 5.254                          | -0.004               | 0.211                 | 1.020                         | 0.200                          | 551.514                     | 1.229                                |
| R29 | Random           | Loggerhead | -26.495           | 153.096            | 12.462             | 5.639                 | 6.239                | 14.833                 | 5.032                          | -0.023               | 0.003                 | 9.000                         | 0.906                          | 90.471                      | 5.881                                |
| R30 | Random           | Loggerhead | -26.495           | 153.096            | 14.547             | 5.183                 | 4.789                | 22.632                 | 5.323                          | 0.026                | 0.039                 | 0.000                         | 0.100                          | 78.339                      | 3.086                                |
| R31 | Random           | Loggerhead | -26.475           | 153.099            | 33.280             | 2.257                 | 14.374               | 14.633                 | 6.246                          | 0.065                | 0.113                 | 0.447                         | 0.000                          | 147.580                     | 4.379                                |
| R32 | Random           | Loggerhead | -26.475           | 153.099            | 32.733             | 2.735                 | 16.907               | 15.541                 | 7.308                          | 0.003                | 0.001                 | 33.121                        | 3.008                          | 187.171                     | 7.752                                |
| R33 | Random           | Loggerhead | -26.447           | 153.104            | 19.969             | 5.276                 | 13.240               | 15.902                 | 7.154                          | 0.000                | 0.014                 | 0.000                         | 0.400                          | 298.277                     | 3.850                                |
| R34 | Random           | Loggerhead | -26.447           | 153.104            | 16.668             | 6.961                 | 14.641               | 12.827                 | 6.983                          | 0.024                | 0.037                 | 1.404                         | 0.000                          | 315.626                     | 5.217                                |
| R35 | Random           | Loggerhead | -26.449           | 153.104            | 32.247             | 2.130                 | 14.684               | 15.980                 | 6.643                          | -0.005               | 0.030                 | 0.000                         | 0.200                          | 336.305                     | 3.262                                |
| R36 | Random           | Loggerhead | -26.449           | 153.104            | 32.976             | 2.953                 | 14.618               | 16.559                 | 7.011                          | 0.000                | 0.001                 | 21.992                        | 4.826                          | 346.733                     | 7.202                                |
| R37 | Random           | Loggerhead | -26.442           | 153.105            | 23.444             | 5.995                 | 10.984               | 16.821                 | 6.827                          | -0.010               | 0.023                 | 9.936                         | 2.470                          | 157.867                     | 4.586                                |
| R38 | Random           | Loggerhead | -26.442           | 153.105            | 14.100             | 6.100                 | 14.727               | 17.284                 | 7.082                          | -0.011               | 0.136                 | 6.720                         | 0.500                          | 136.312                     | 8.819                                |
| R39 | Random           | Loggerhead | -26.436           | 153.107            | 18.668             | 4.663                 | 19.007               | 14.222                 | 6.897                          | 0.000                | 0.004                 | 10.102                        | 4.305                          | 142.004                     | 5.881                                |
| R40 | Random           | Loggerhead | -26.436           | 153.107            | 31.419             | 6.070                 | 13.300               | 17.661                 | 8.574                          | 0.020                | 0.006                 | 15.446                        | 12.264                         | 142.352                     | 6.101                                |
| R41 | Random           | Loggerhead | -26.430           | 153.108            | 11.957             | 5.671                 | 8.819                | 19.274                 | 6.254                          | 0.027                | 0.007                 | 1.105                         | 0.000                          | 191.951                     | 9.581                                |
| R42 | Random           | Loggerhead | -26.430           | 153.108            | 12.926             | 4.236                 | 11.510               | 14.725                 | 5.614                          | 0.048                | 0.031                 | 5.914                         | 0.000                          | 185.311                     | 6.101                                |
| R43 | Random           | Loggerhead | -26.428           | 153.108            | 15.111             | 5.465                 | 18.800               | 11.234                 | 7.759                          | 0.004                | 0.068                 | 2.631                         | 0.000                          | 196.621                     | 6.752                                |
| R44 | Random           | Loggerhead | -26.428           | 153.108            | 1.900              | 7.566                 | 32.047               | 7.794                  | 6.963                          | 0.020                | 0.056                 | 1.700                         | 0.000                          | 192.844                     | 8.268                                |
| R45 | Random           | Loggerhead | -26.424           | 153.109            | 50.525             | 3.651                 | 8.485                | 16.592                 | 8.307                          | -0.020               | 0.028                 | 0.000                         | 2.000                          | 89.889                      | 4.714                                |
| R46 | Random           | Loggerhead | -26.424           | 153.108            | 52.200             | 4.080                 | 7.669                | 19.057                 | 8.268                          | -0.024               | 0.001                 | 17.147                        | 6.301                          | 119.407                     | 5.314                                |
| R48 | Random           | Loggerhead | -26.415           | 153.111            | 32.163             | 5.376                 | 9.646                | 1.399                  | 3.678                          | -0.013               | 0.010                 | 0.000                         | 0.860                          | 50.990                      | 4.502                                |
| R49 | Random           | Loggerhead | -26.591           | 153.098            | 20.169             | 6.828                 | 8.010                | 18.925                 | 6.074                          | -0.006               | 0.004                 | 24.664                        | 17.018                         | 89.275                      | 1.635                                |
| R50 | Random           | Loggerhead | -26.591           | 153.098            | 23.244             | 5.684                 | 8.996                | 15.976                 | 5.684                          | 0.001                | 0.006                 | 20.957                        | 10.382                         | 82.607                      | 2.256                                |
| R51 | Random           | Loggerhead | -26.585           | 153.098            | 17.560             | 5.653                 | 7.600                | 17.169                 | 5.925                          | 0.017                | 0.468                 | 0.000                         | 6.251                          | 62.000                      | 1.929                                |
| R52 | Random           | Loggerhead | -26.585           | 153.097            | 16.889             | 4.928                 | 7.900                | 19.032                 | 6.051                          | 0.004                | 0.001                 | 15.231                        | 6.155                          | 90.449                      | 3.144                                |
